# Supplementary material for: Serological diagnosis of autoimmune bullous skin diseases: Prospective comparison of the BIOCHIP mosaic-based indirect immunofluorescence technique with the conventional multi-step single test strategy
Source: PubMed Central journal article supplement (PMC3533694; doi:10.1186/1750-1172-7-49), 2012-08-09

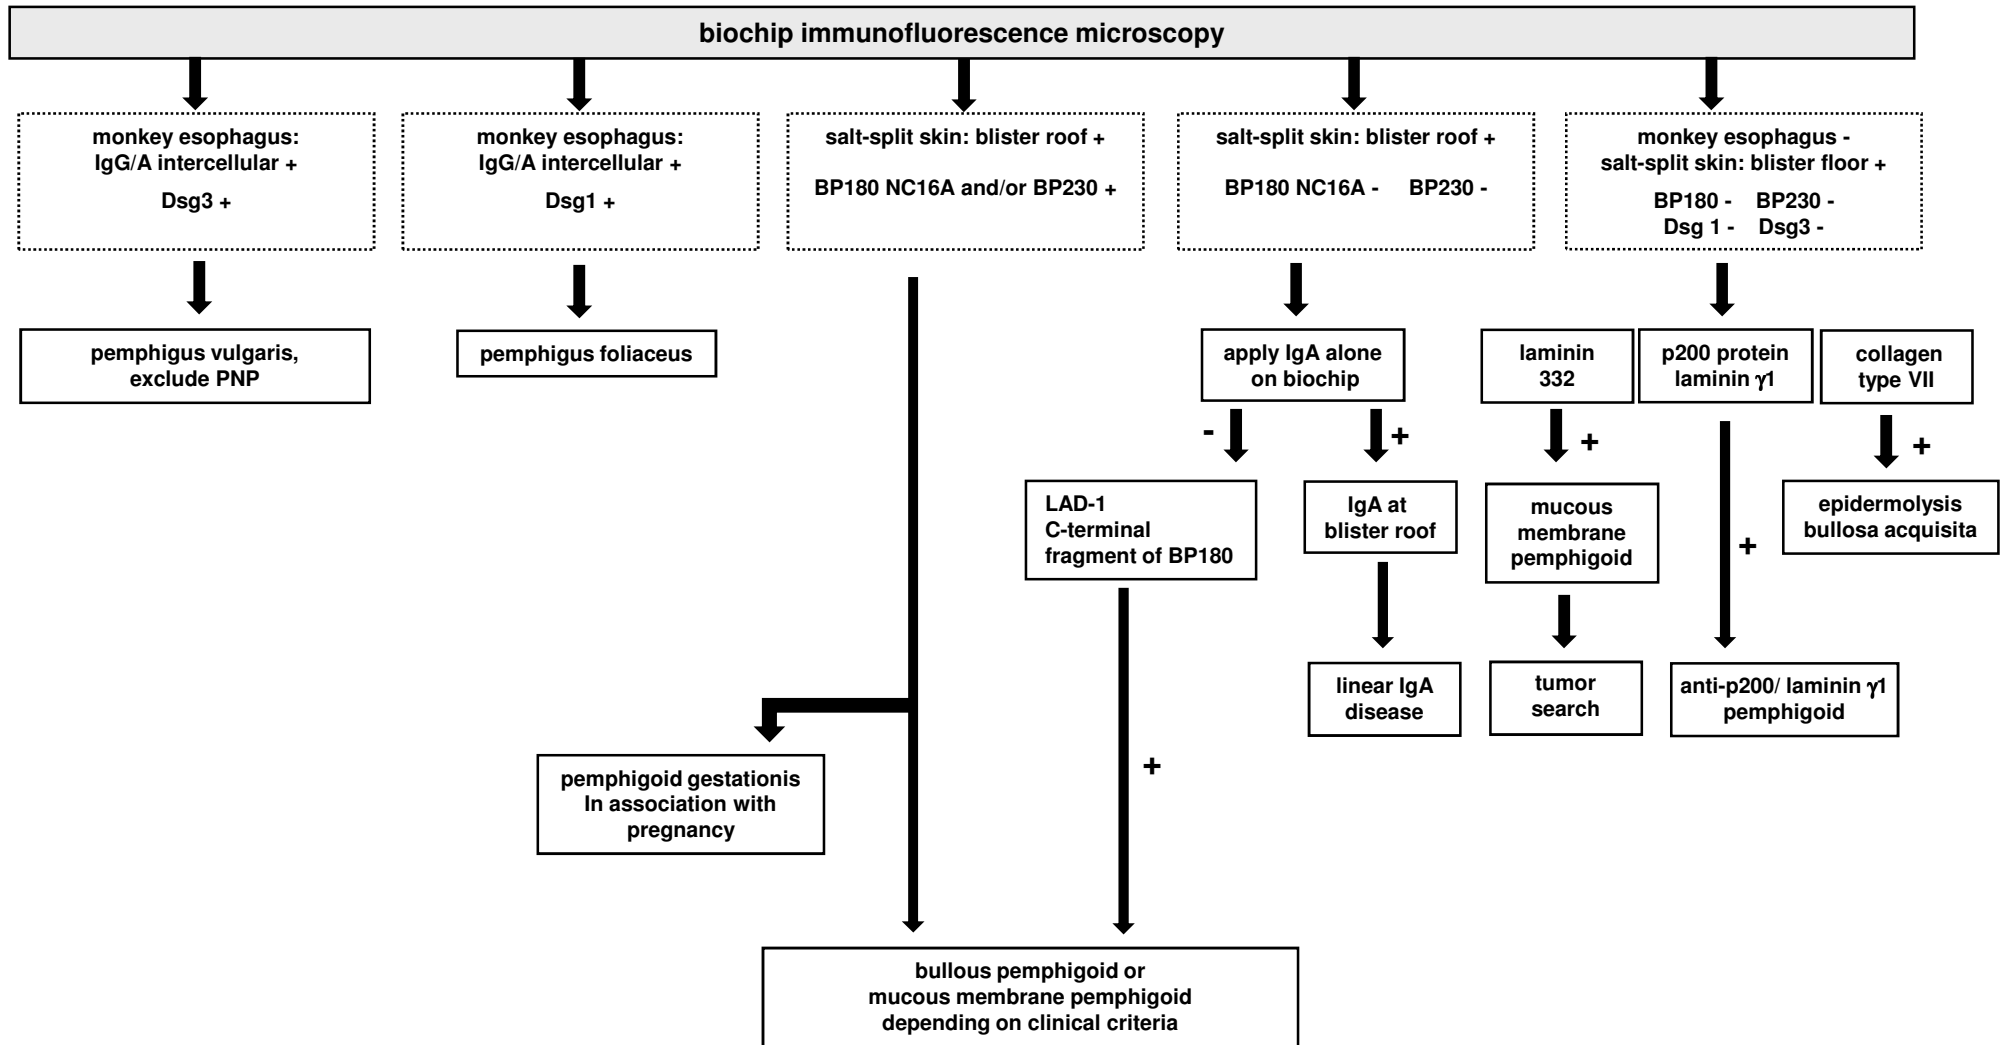

Supplement: 1750-1172-7-49-S1.pdf [file 1750-1172-7-49-S1.pdf]
